# Supplementary material
Source: PubMed Central journal article supplement (PMC3684230)
Supplement: DS_10.1177_0022034513487906.pdf [file DS_10.1177_0022034513487906.pdf]

P. Atsawasuwan<sup>1,2</sup>, X. Lu<sup>1</sup>, Y. Ito<sup>1</sup>, Y. Chen<sup>2</sup>,  
G. Gopinathan<sup>1</sup>, C.A. Evans<sup>2</sup>, A.B. Kulkarni<sup>4</sup>,  
C.W. Gibson<sup>5</sup>, X. Luan<sup>1,2,3</sup>,  
and T.G.H. Diekwisch<sup>1,2,3\*</sup>

<sup>1</sup>Brodie Laboratory for Craniofacial Genetics, University of Illinois at Chicago, IL 60612, USA; <sup>2</sup>Department of Orthodontics, University of Illinois at Chicago, IL 60612, USA; <sup>3</sup>UIC Department of Oral Biology, College of Dentistry, IL, USA; <sup>4</sup>National Institute of Dental and Craniofacial Research, National Institutes of Health, Bethesda, MD, USA; and <sup>5</sup>Department of Anatomy and Cell Biology, University of Pennsylvania School of Dental Medicine, Philadelphia, PA, USA; \*corresponding author, tomkw@uic.edu

## Expression and Function of Enamel-related Gene Products in Calvarial Development

*J Dent Res* DOI: 10.1177/0022034513487906

### APPENDIX

**Appendix Table 1.** Primer Sequences for Real-time PCR

| Name/Accession Number | Forward Primer              | Reverse Primer              |
|-----------------------|-----------------------------|-----------------------------|
| Amel NM_001081978.2   | 5' GCACCACAGCCACCTCTGCC 3'  | 5' CGCCACTTCTCCCGCTTGGT 3'  |
| Ambn NM_009664.1      | 5' GCCAACCCAGGCAAACGGGA 3'  | 5' CCCTGCAGGACCCCTTGCCA 3'  |
| Enam NM_017468.3      | 5' GCTTTGGCTCCAATTCAAAA 3'  | 5' AGGACTTTCAGTGGGTGTGG 3'  |
| Amtn NM_027793.1      | 5' CAGGGAACCACTCCGGGCCA 3'  | 5' TGGTGTGTGTGGCCCTTCGC 3'  |
| Odam NM_027128.2      | 5' GCTCAGGTCTCAGGACGCCCA 3' | 5' CCTGGCCTCCTTGGGCAAGTC 3' |
| Mmp20 NM_013903.2     | 5' GGTGCTACCTGCCTCTGGCCT 3' | 5' GTCCTAGGGGTGGCTGCCAGT 3' |
| Klk4 NM_019928.1      | 5' CCGGATCATACAAGGCCAGG 3'  | 5' TGCGGATGCACCAAGACTC 3'   |
| Msx2 NM_013601.2      | 5' CACAGTCCCGGGCCTCTCGT 3'  | 5' CGGGGAGTATCTGCCGGGCT 3'  |
| Twist1 NM_011658.2    | 5' TGGCGGCCAGGTACATCGACT 3' | 5' CCAGGCCCTCCATCCTCC 3'    |
| Alx4 NM_007442.3      | 5' GTGCCAGCCTGTGTGGTCCC 3'  | 5' GTCTGGCCCACGTGACTGCC 3'  |
| Fgfr2 NM_010207.2     | 5' AACAGCGGACACCCCGATGC 3'  | 5' GCCCGAAGCAACCTTCCCC 3'   |
| Col1a1 NM_007742.3    | 5' AAGACCTCCCGCTGCCCAT 3'   | 5' CACGAAGCAGGCAGGGCCAA 3'  |
| Ibsp NM_008318.3      | 5' GGAACCACAGGGGGCAGGGA 3'  | 5' TCCCATAGGCTTCGGGCGGT 3'  |
| β actin NM_007393     | 5' GCTACAGCTTACCACCACA 3'   | 5' TCTCCAGGGAGGAAGAGGAT 3'  |

\* All the PCR products were dissociated and sequenced and compared with the EMBL/GenBank sequence at DNA facility, University of Illinois at Chicago.

**Appendix Table 2.** Types and Concentrations of Antibodies

| Name        | Animal                      | Concentration |
|-------------|-----------------------------|---------------|
| Amelx       | Chicken anti-mouse (Zymed)  | 1: 5,000      |
| Ambn        | Rabbit anti-mouse (Zymed)   | 1: 1,500      |
| Enam        | Rabbit anti-mouse (Yenzym)  | 1: 800        |
| Rabbit IgG  | Donkey anti-rabbit (Abcam)  | 1: 2,500      |
| Chicken IgY | Donkey anti-chicken (Abcam) | 1: 5,000      |
